# Supplementary material for: OSDA-free and steam-assisted synthesis of PHI type zeolite showing a unique CO2 adsorption behaviour
Source: Royal Society of Chemistry journal article supplement (doi:10.1039/d2ce00440b), 2022-01-01
Supplement: d2ce00440b1.pdf [file d2ce00440b1.pdf]

## Supplementary information

### **OSDA-free and steam-assisted synthesis of PHI type zeolite showing unique CO<sub>2</sub> adsorption behaviour**

Yuto Higuchi,<sup>\*a</sup> Sana Miyagawa<sup>a</sup> and Shunsuke Tanaka<sup>a,b</sup>

*<sup>a</sup>Department of Chemical, Energy and environmental Engineering,  
Faculty of environmental and Urban Engineering, Kansai University,  
3-3-35 Yamate-cho, Suita-shi, Osaka 564-8680 JAPAN.*

*E-mail: k640161@kansai-u.ac.jp (YH)*

*<sup>b</sup>Organization for Research and Development of Innovative Science and  
Technology (ORDIST), Kansai University, 3-3-35 Yamate-cho, Suita-shi,  
Osaka 564-8680 JAPAN.*

*E-mail: shun\_tnk@kansai-u.ac.jp (ST)*

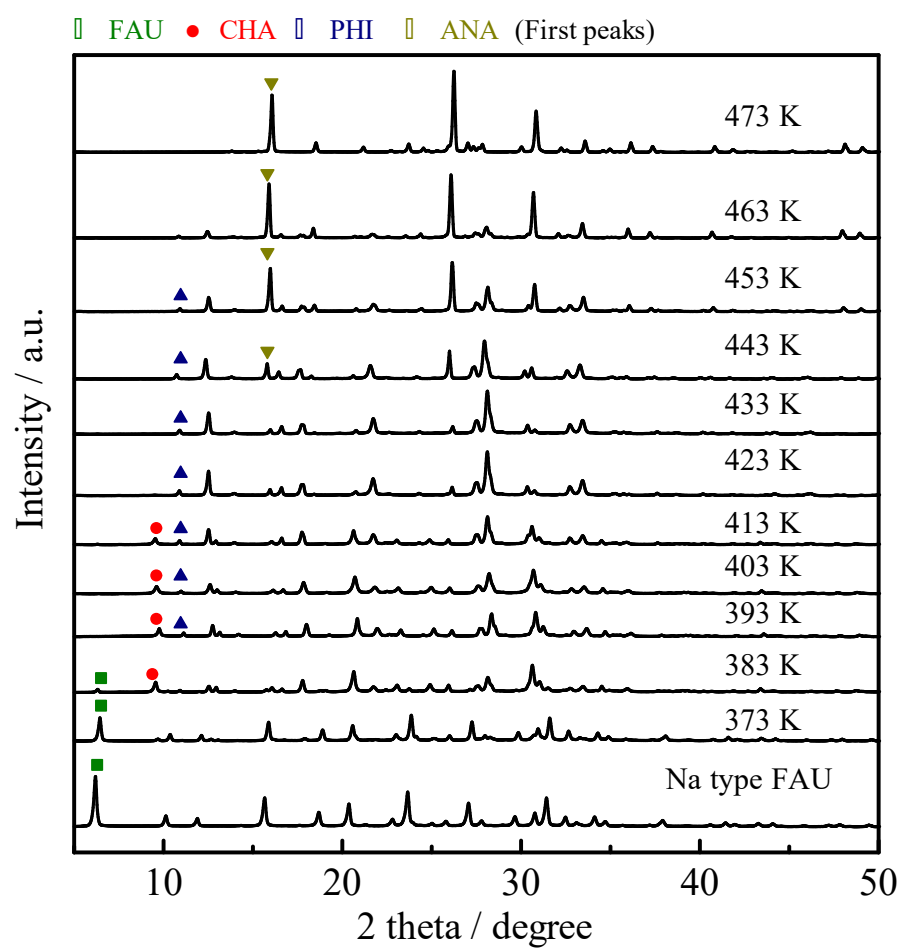

Fig. S1 PXRD patterns of FAU zeolite and products converted from FAU zeolite at different temperatures.

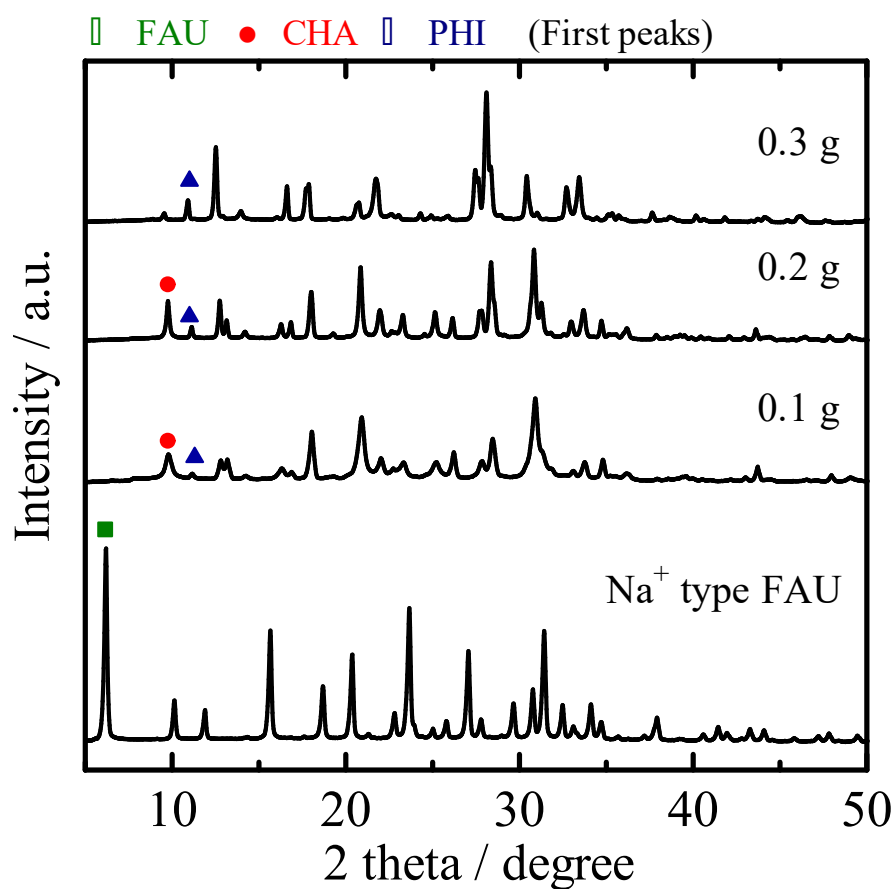

Fig. S2 PXRD patterns of FAU zeolite and products converted from FAU zeolite at different amounts of KOH. The synthesis temperature and time were 393 K and 24 h, respectively.

The crystallinity of the products converted from FAU using 0.1 g KOH was weaker compared to using 0.2 g KOH. On the other hand, the intensity of CHA first peak was not observed with increasing the amount of KOH. Therefore, 0.2 g of KOH was suitable for this interzeolite transformation process.
